# Supplementary material
Source: Research Square preprint supplement (doi:10.21203/rs.3.rs-9260848/v1)
Supplement: Supplementary file 1 [file 01c7eac2c905a74f2564e7ca.pdf]

## **Supplementary**

**Supplementary Table 1.** Summary of thermal tolerance (ED30) for both species across bays. Values represent the number of colonies sampled (n), mean ED30, standard deviation (SD), variance (Var), coefficient of variation (CV), minimum ED30 (Min\_ed) and maximum ED30 (Max\_ed).

| <b>Species</b>      | <b>Bay</b>   | <b>N</b> | <b>Mean</b> | <b>SD</b> | <b>Var</b> | <b>CV</b> | <b>Min_ed</b> | <b>Max_ed</b> |
|---------------------|--------------|----------|-------------|-----------|------------|-----------|---------------|---------------|
| <i>M. capitata</i>  | Kāneʻohe Bay | 15       | 6.47        | 0.383     | 0.146      | 0.059     | 5.93          | 7.14          |
| <i>M. capitata</i>  | Ulupaʻu      | 5        | 6.34        | 0.094     | 0.009      | 0.015     | 6.22          | 6.45          |
| <i>P. compressa</i> | Kāneʻohe Bay | 15       | 6.60        | 0.259     | 0.067      | 0.039     | 6.17          | 7.03          |
| <i>P. compressa</i> | Ulupaʻu      | 5        | 6.99        | 0.030     | 0.025      | 0.025     | 6.83          | 7.21          |
